# Supplementary material
Source: publisher figshare collection journal article supplement (https://acs.figshare.com/ndownloader/files/4464817)
Supplement: Supplementary file 1 [file 4464817]

# Supporting information for:

## Fabrication of Surface-Modified Hydrogels with Polyion Complex for Controlled Release

Yukie Takemoto,<sup>†</sup> Hiroharu Ajiro,<sup>†,‡</sup> Taka-aki Asoh,<sup>†</sup> and Mitsuru Akashi<sup>†,‡\*</sup>

<sup>†</sup>Department of Applied Chemistry, Graduate School of Engineering, Osaka University, 2-1 Yamada-oka, Suita, Osaka 565-0871, Japan, and <sup>‡</sup>The Center for Advanced Medical Engineering and Informatics, Osaka University, 2-2 Yamada-oka, Suita, Osaka, 565-0871, Japan

### I. Preparation of hydrogels`

**Scheme 1.** Preparation of *N*, *N*-oxanonamethylene-bis-*N*-vinylacetamide (5ON-bis-NVA). (Reference: Ajiro, H.; Takemoto, Y.; Akashi, M. *Chem. Lett.* **2009**, 38, 368.)

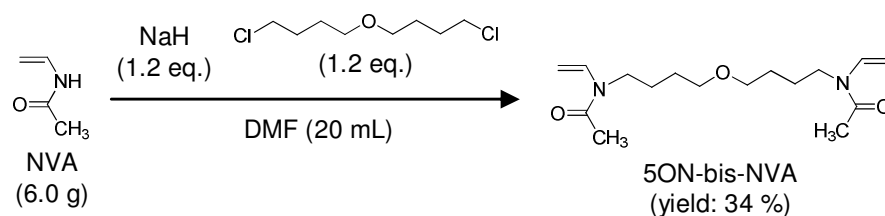

**Table S1.** Elemental analysis of hydrolysis ratio of amide group in NVF unit

| Entry | Hydrolysis Time (h) | H (%) | C (%) | N (%) | [C]/[N] | Hydrolysis ratio (%) |
|-------|---------------------|-------|-------|-------|---------|----------------------|
| 1     | 0                   | 7.52  | 51.21 | 17.98 | 3.32    | 0                    |
| 2     | 1                   | 6.83  | 42.82 | 15.33 | 3.26    | 9                    |
| 3     | 2                   | 7.23  | 38.58 | 15.44 | 2.91    | 60                   |
| 4     | 4                   | 7.13  | 37.05 | 15.41 | 2.80    | 77                   |
| 5     | 9                   | 7.31  | 34.74 | 15.02 | 2.70    | 92                   |

## II. Length ratio of PIC gel under various pH conditions

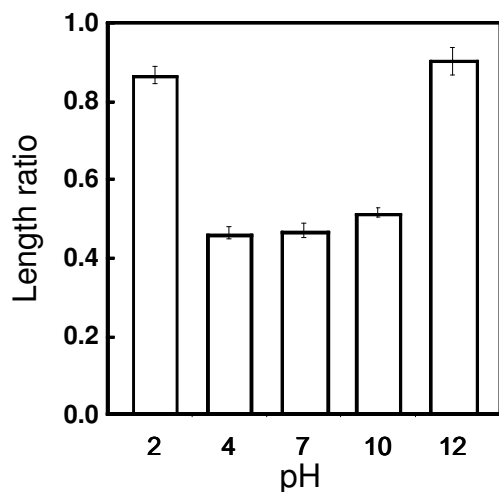

**Figure S1.** The length ratio of cylindrical-shaped PIC gel under various pH conditions. Length ratio =  $D/D_0$ , where  $D$  is the diameter of PIC gel under various pH conditions and  $D_0$  is the diameter of poly(NVA-*co*-NVF) hydrogel (4.4 mm), respectively.

## III. pH responsive release of FITC-Dex

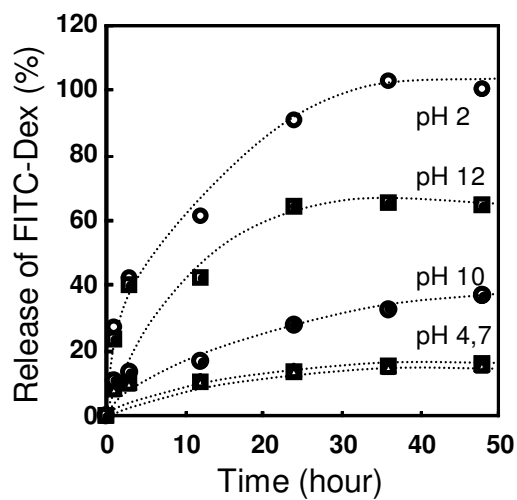

**Figure S2.** The releasing profile of FITC-Dex from a PIC gel under various pH conditions.
